# Supplementary material
Source: publisher site journal article supplement (https://www.spandidos-publications.com/4392/downloadSupplementary)

Figure S1. Expression of p62 in normal endometrium, and endometrioid carcinoma Grade 1 and Grade 3. Western blotting of p62 with proteins extracted from FFPE samples. SP, secretory phase; G1, endometrioid carcinoma Grade 1; G3, endometrioid carcinoma Grade 3.

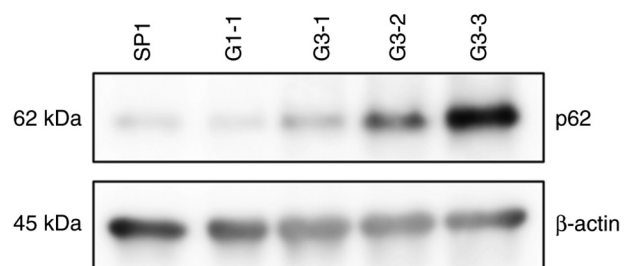

Supplement: Supplementary file 1 [file downloadSupplementary]
